# Supplementary material for: Rational design of one-pot solvent-assisted synthesis for multi-functional Sn-substituted superionic Li argyrodite solid electrolytes
Source: Royal Society of Chemistry journal article supplement (doi:10.1039/d3ta01955a), 2023-01-01
Supplement: d3ta01955a1.pdf [file d3ta01955a1.pdf]

## ***Supplementary Information***

# **Rational Design of One-Pot Solvent-Assisted Synthesis for Multi-Functional Sn-Substituted Superionic Li Argyrodite Solid Electrolytes**

*Sun Hee Choi<sup>a</sup>, Woong-Ju Kim<sup>a</sup>, Byeong-hyeon Lee<sup>b</sup>, Sung-Chul Kim<sup>b</sup>, Jin Gu Kang<sup>c,\*</sup>,  
Dong-Wan Kim<sup>a,\*</sup>*

<sup>a</sup> School of Civil, Environmental and Architectural Engineering, Korea University, Seoul 02841, South Korea

<sup>b</sup> Advanced Analysis Center, Korea Institute of Science and Technology, Seoul 02792, South Korea

<sup>c</sup> Nanophotonics Research Center, Korea Institute of Science and Technology, Seoul 02792, South Korea

### **Corresponding Author**

\*E-mail: [dwkim1@korea.ac.kr](mailto:dwkim1@korea.ac.kr) (D.-W. Kim)

\*E-mail: [lucid1@kist.re.kr](mailto:lucid1@kist.re.kr) (J.G. Kang)

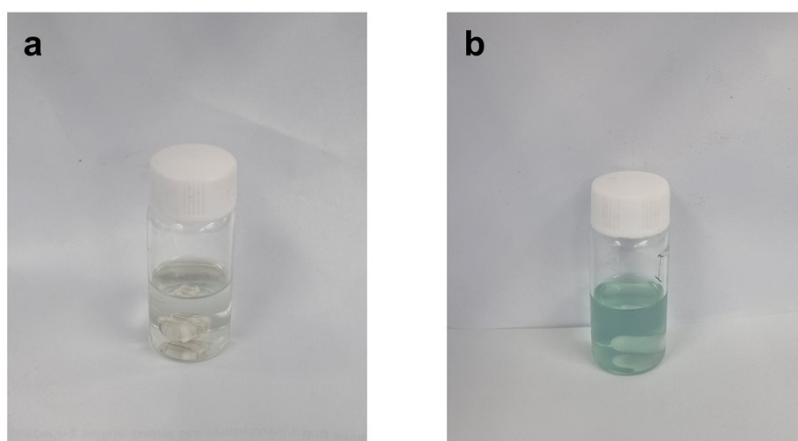

**Figure S1.** Photographs of acetonitrile (ACN) solutions of (a) 4% w/v LiBr and (b) 5% w/v LiI. The concentrations are the same as those used for synthesizing  $\text{Li}_6\text{PS}_5\text{Br}$  and  $\text{Li}_6\text{PS}_5\text{I}$ , respectively.

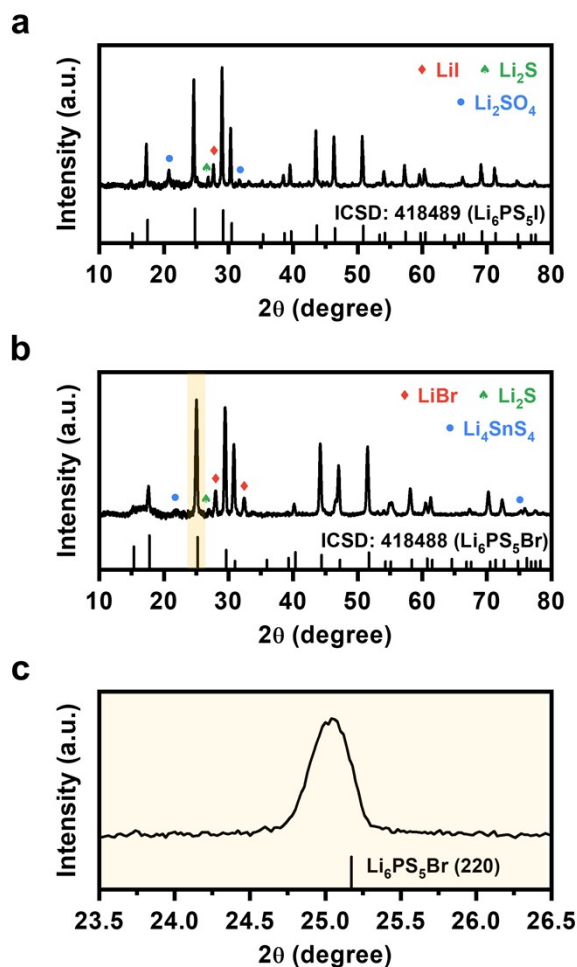

**Figure S2.** (a) X-ray diffraction (XRD) pattern of the sample fabricated by mixing  $\text{Li}_2\text{S}$ ,  $\text{LiI}$ , and  $\text{P}_2\text{S}_5$  simultaneously in ACN. (b) XRD pattern and (c) its magnified view in the  $2\theta$  range from  $23.5$  to  $26.5^\circ$  (shaded in yellow) for the sample prepared by simultaneously adding  $\text{P}_2\text{S}_5$  and  $\text{SnS}_2$  (12.5 at%) to a mixture of  $\text{Li}_2\text{S}$  and  $\text{LiBr}$  in ACN. In (c), the peak corresponding to the (220) plane exhibits a small downward shift compared to that of non-substituted  $\text{Li}_6\text{PS}_5\text{Br}$ , indicating negligible Sn substitution in the host lattice.

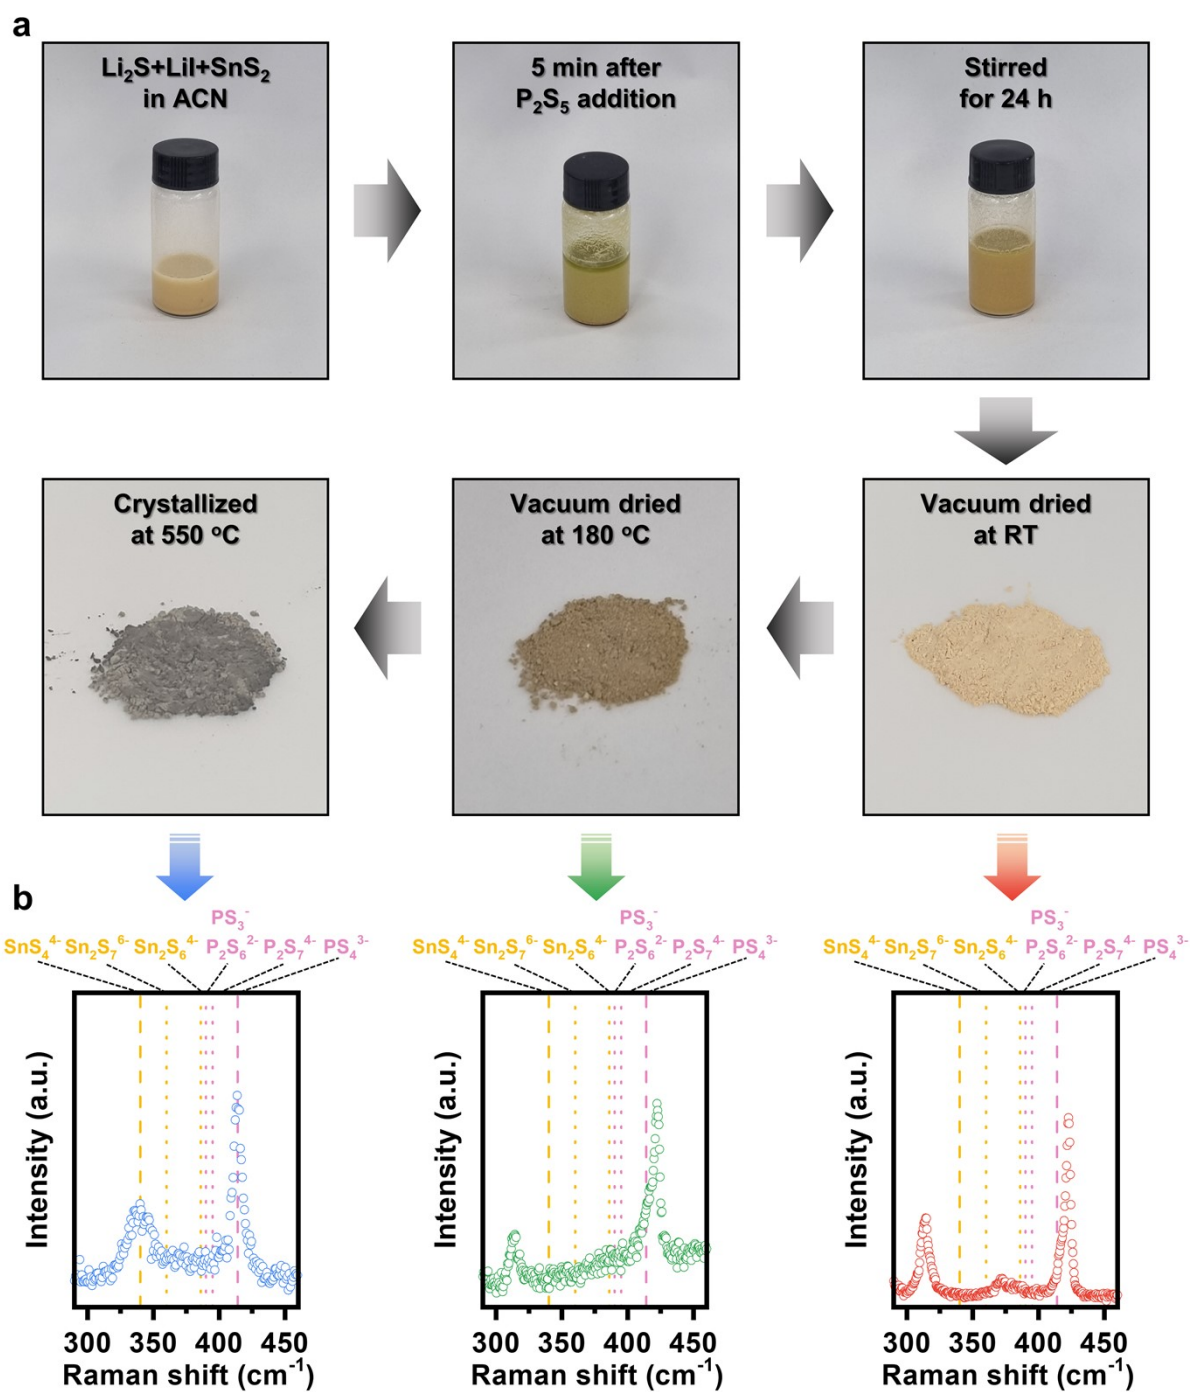

**Figure S3.** (a) Photographs of the ACN suspension and prepared powders taken at each fabrication step for obtaining  $\text{Li}_{6.2}\text{P}_{0.8}\text{Sn}_{0.2}\text{S}_5\text{I}$ . (b) Raman spectra collected after vacuum drying at  $\sim 25^\circ\text{C}$  (right panel), after vacuum drying at  $180^\circ\text{C}$  (middle panel), and after heat-treatment at  $550^\circ\text{C}$  (left panel). The Raman modes for various thiostannate and thiophosphate units are indicated above the plots.

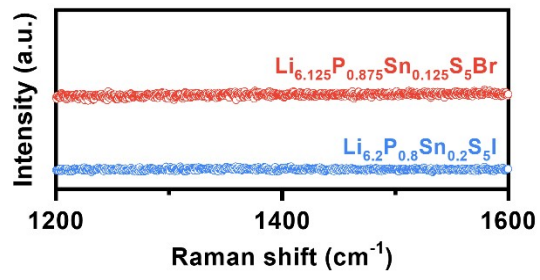

**Figure S4.** Raman spectra of  $\text{Li}_{6.125}\text{P}_{0.875}\text{Sn}_{0.125}\text{S}_5\text{Br}$  and  $\text{Li}_{6.2}\text{P}_{0.8}\text{Sn}_{0.2}\text{S}_5\text{I}$  in the range from 1200 to 1600  $\text{cm}^{-1}$ . No D- and G-modes of carbonaceous phases are observed.

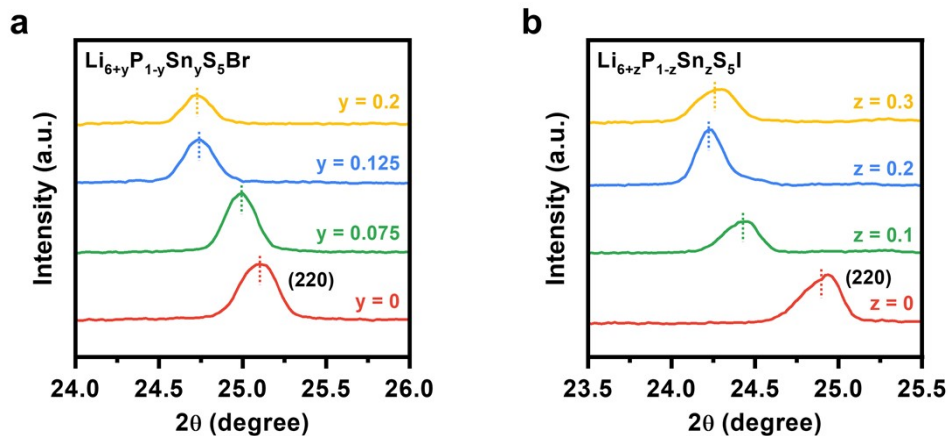

**Figure S5.** Magnified XRD patterns scans of (a)  $\text{Li}_{6+y}\text{P}_{1-y}\text{Sn}_y\text{S}_5\text{Br}$  ( $y = 0, 0.075, 0.125,$  and  $0.2$ ) and (b)  $\text{Li}_{6+z}\text{P}_{1-z}\text{Sn}_z\text{S}_5\text{I}$  ( $z = 0, 0.1, 0.2,$  and  $0.3$ ). The peak of the (220) plane shifts toward a lower  $2\theta$  value with increasing Sn substitution level. However, the peak position remains constant beyond  $y = 0.125$  for  $\text{Li}_{6+y}\text{P}_{1-y}\text{Sn}_y\text{S}_5\text{Br}$  (a) and  $z = 0.2$  for  $\text{Li}_{6+z}\text{P}_{1-z}\text{Sn}_z\text{S}_5\text{I}$  (b).

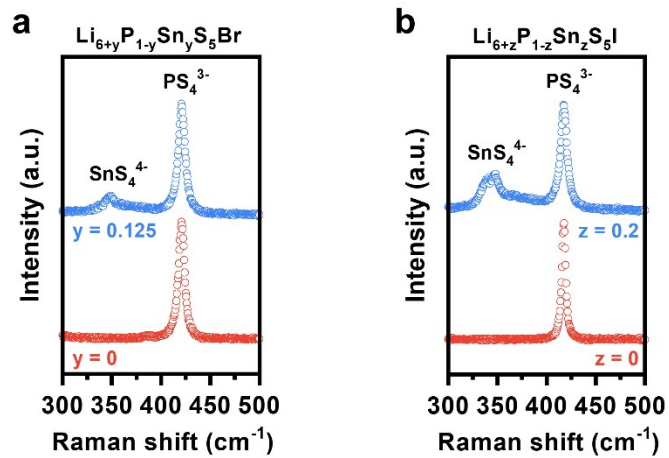

**Figure S6.** Raman spectra of (a)  $\text{Li}_{6+y}\text{P}_{1-y}\text{Sn}_y\text{S}_5\text{Br}$  ( $y = 0, 0.125$ ) and (b)  $\text{Li}_{6+z}\text{P}_{1-z}\text{Sn}_z\text{S}_5\text{I}$  ( $z = 0, 0.2$ ).

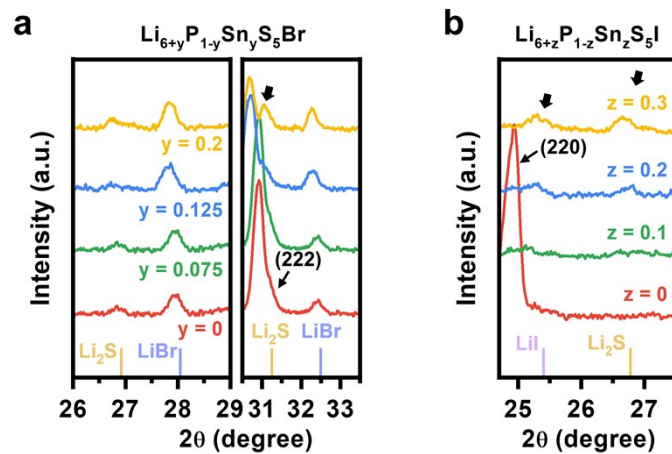

**Figure S7.** Magnified XRD patterns of (a)  $\text{Li}_{6+y}\text{P}_{1-y}\text{Sn}_y\text{S}_5\text{Br}$  ( $y = 0, 0.075, 0.125, 0.2$ ) and (b)  $\text{Li}_{6+z}\text{P}_{1-z}\text{Sn}_z\text{S}_5\text{I}$  ( $z = 0, 0.1, 0.2, 0.3$ ) showing the evolution of impurity phases with increasing Sn-substitution concentration. The strong peaks in each graph correspond to Li-argyrodite phases.



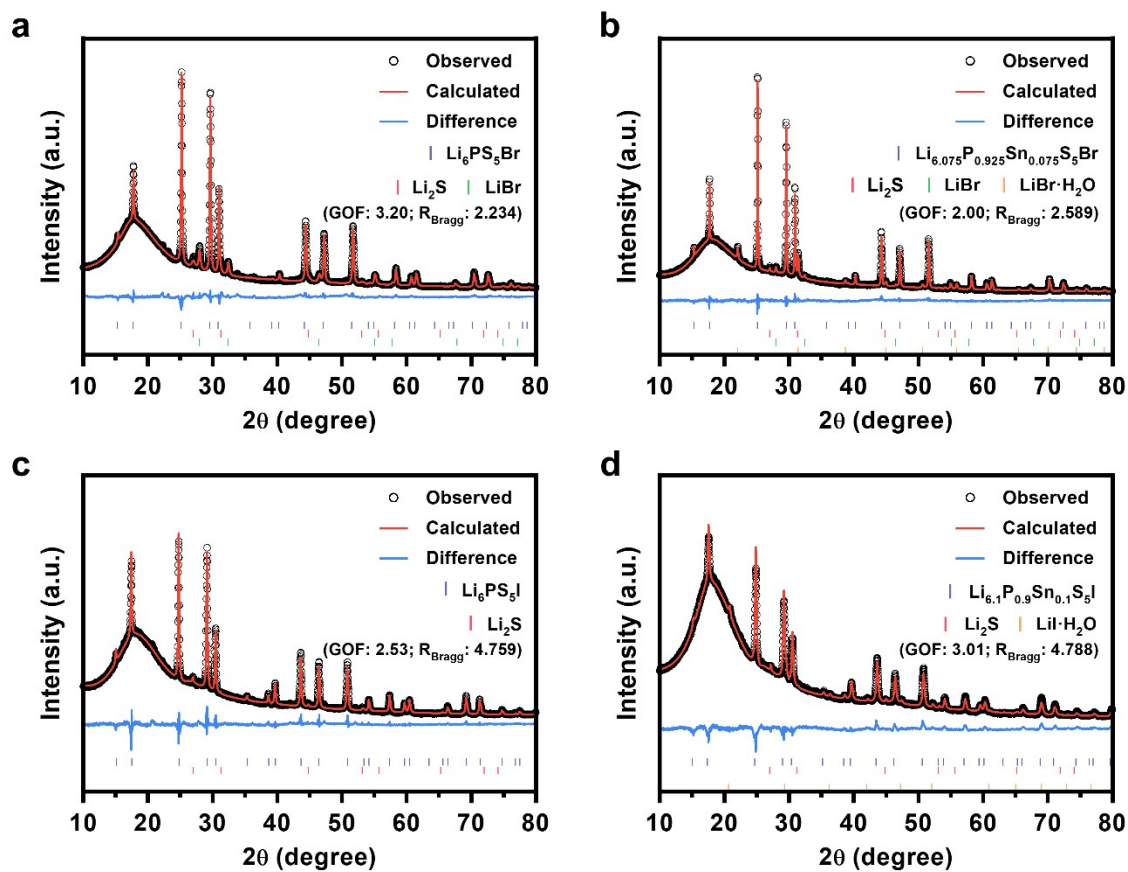

**Figure S8.** Low-scan speed XRD patterns and Rietveld refinement results for (a)  $\text{Li}_6\text{PS}_5\text{Br}$ , (b)  $\text{Li}_{6.075}\text{P}_{0.925}\text{Sn}_{0.075}\text{S}_5\text{Br}$ , (c)  $\text{Li}_6\text{PS}_5\text{I}$ , and (d)  $\text{Li}_{6.1}\text{P}_{0.9}\text{Sn}_{0.1}\text{S}_5\text{I}$ .

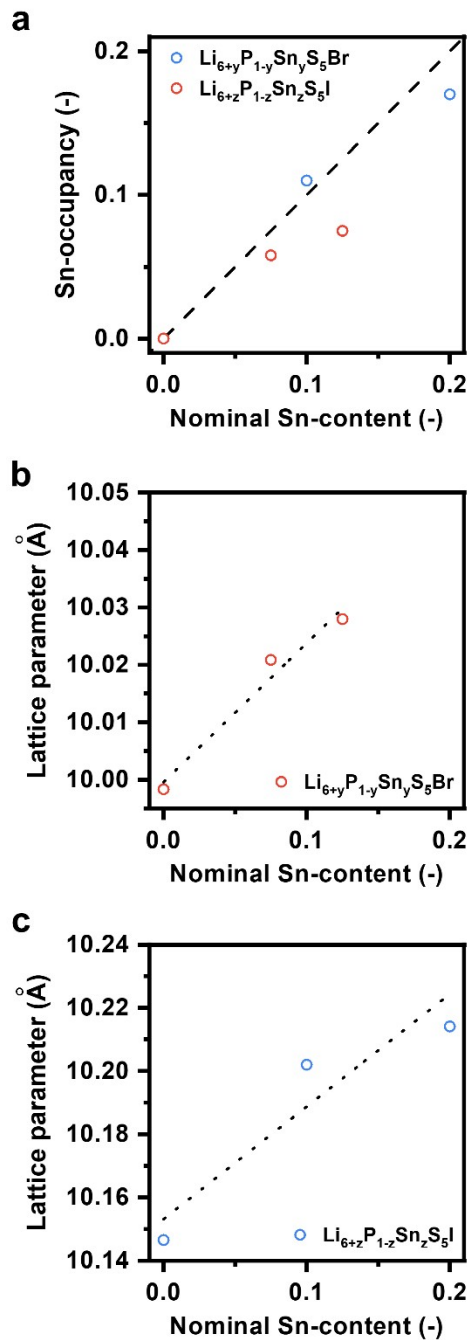

**Figure S9.** (a) Plot of Sn-occupancy determined by Rietveld refinement as a function of nominal Sn-content for bromide- and iodide-argyrodites. Dashed lines denotes Sn-occupancies equal to nominal Sn-content. Plots of lattice parameter determined by Rietveld refinement as a function of nominal Sn-content for (b)  $\text{Li}_{6+y}\text{P}_{1-y}\text{Sn}_y\text{S}_5\text{Br}$  and (c)  $\text{Li}_{6+z}\text{P}_{1-z}\text{Sn}_z\text{S}_5\text{I}$ . The dotted lines denote fitted curves by linear regression.

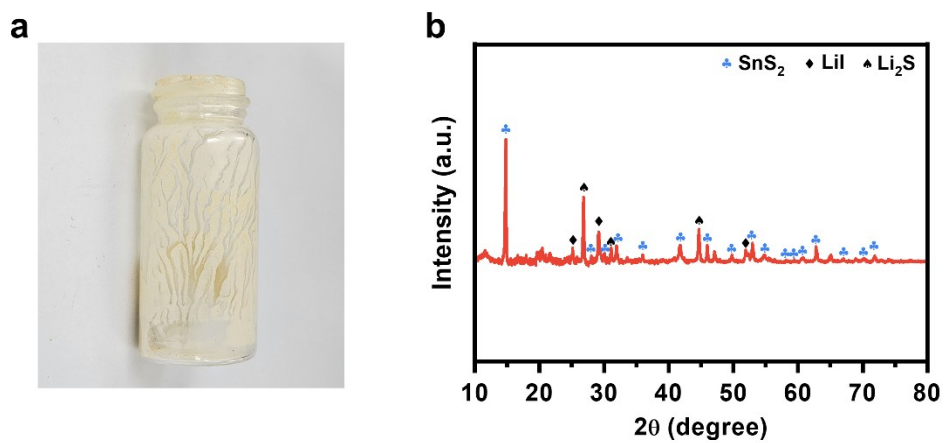

**Figure S10.** (a) Photograph of the unreacted sediments remained at the interior of a vial after transferring an ACN mixture suspension of Li<sub>2</sub>S, SnS<sub>2</sub>, LiI, and P<sub>2</sub>S<sub>5</sub> to a vacuum chamber.

(b) XRD pattern of the sediments.

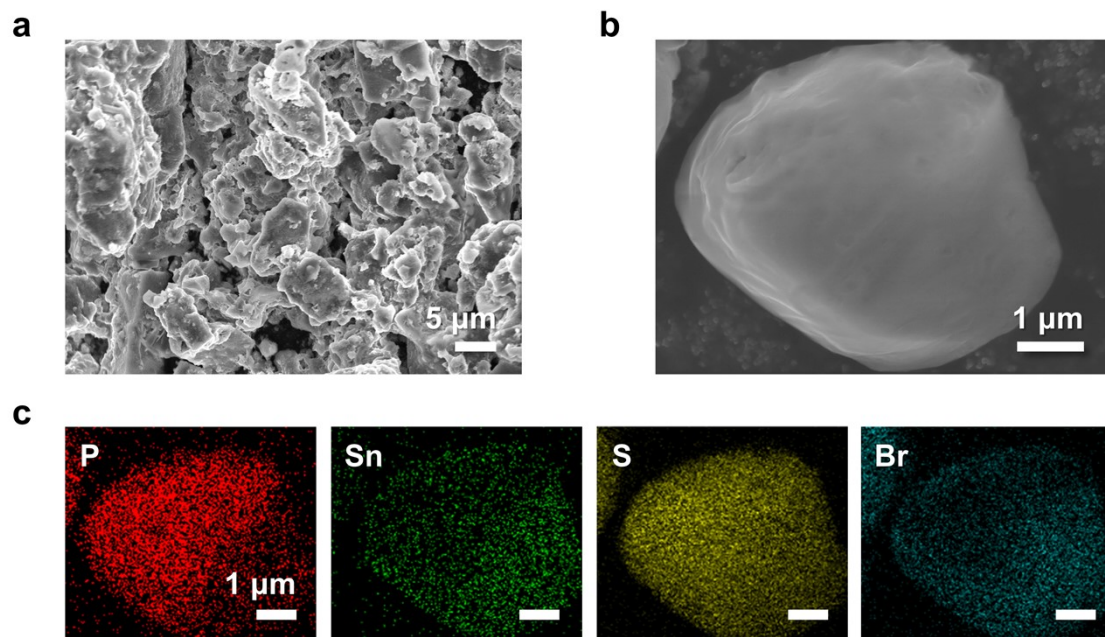

**Figure S11.** (a) Low- and (b) high-magnification scanning electron microscopy (SEM) images of  $\text{Li}_{6.125}\text{P}_{0.875}\text{Sn}_{0.125}\text{S}_5\text{Br}$  and (c) its EDX elemental mapping results for P, Sn, S, and Br.

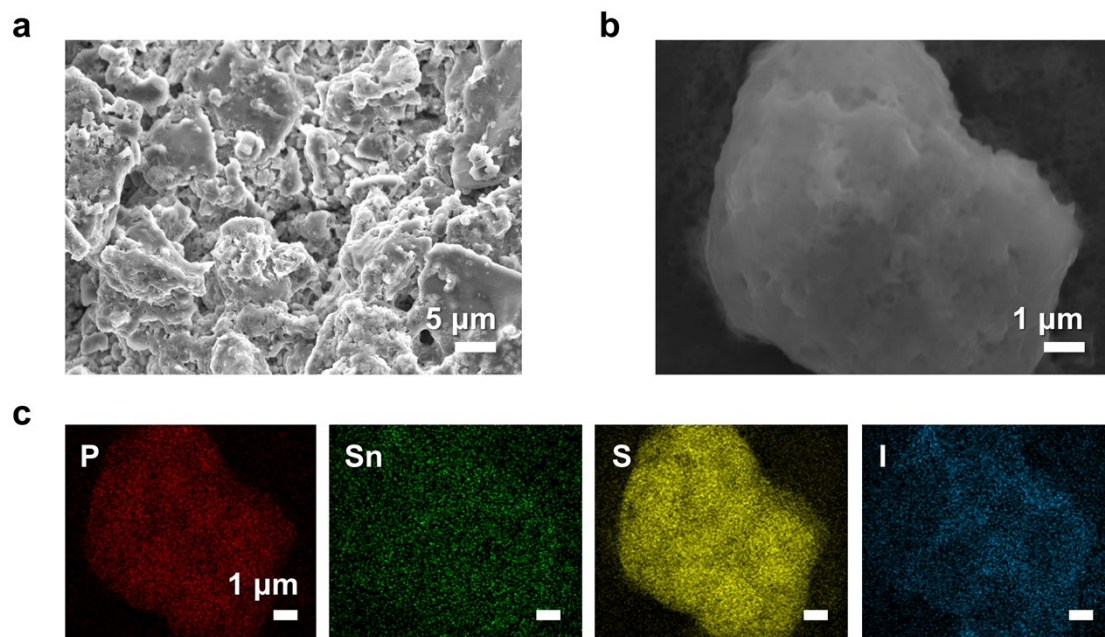

**Figure S12.** (a) Low- and (b) high-magnification SEM images of  $\text{Li}_{6.2}\text{P}_{0.8}\text{Sn}_{0.2}\text{S}_5\text{I}$ , and (c) its EDX elemental mapping results for P, Sn, S, and I.

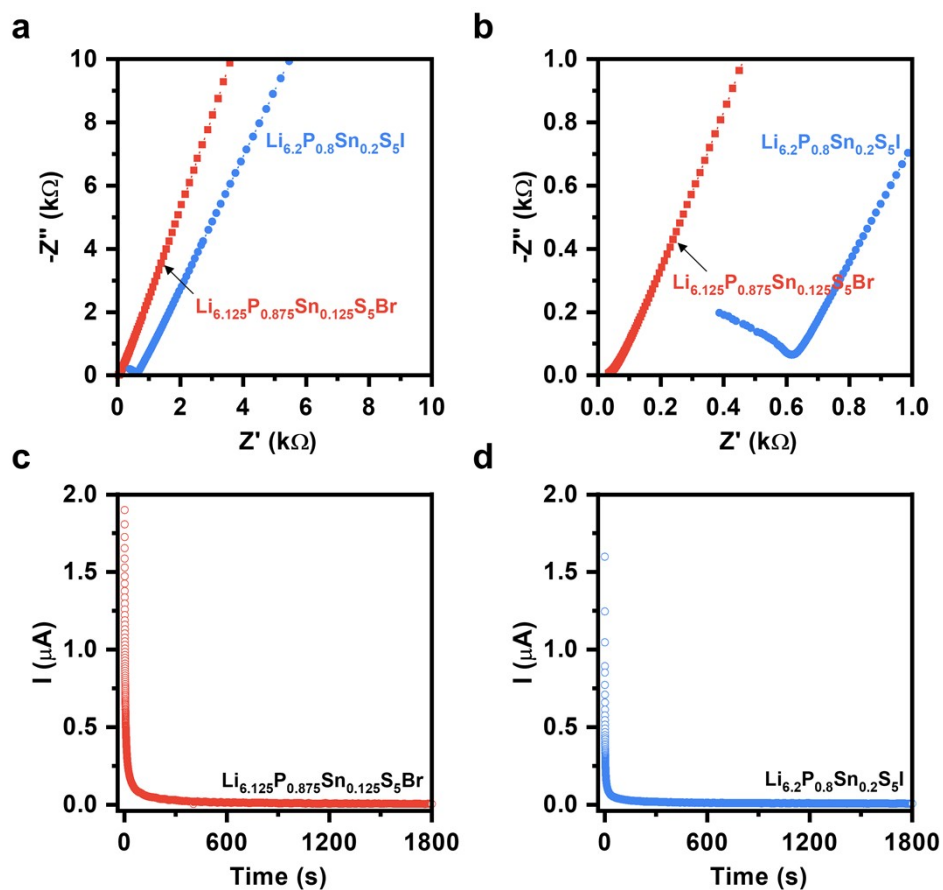

**Figure S13.** (a) Nyquist plots and (b) their magnified versions of  $\text{Li}_{6.125}\text{P}_{0.875}\text{Sn}_{0.125}\text{S}_5\text{Br}$  and  $\text{Li}_{6.2}\text{P}_{0.8}\text{Sn}_{0.2}\text{S}_5\text{I}$ . DC polarization curves of (c)  $\text{Li}_{6.125}\text{P}_{0.875}\text{Sn}_{0.125}\text{S}_5\text{Br}$  and (d)  $\text{Li}_{6.2}\text{P}_{0.8}\text{Sn}_{0.2}\text{S}_5\text{I}$ . Measurements were carried out using symmetric cells comprising solid electrolytes sandwiched between two identical Li-ion-blocking Ti electrodes.

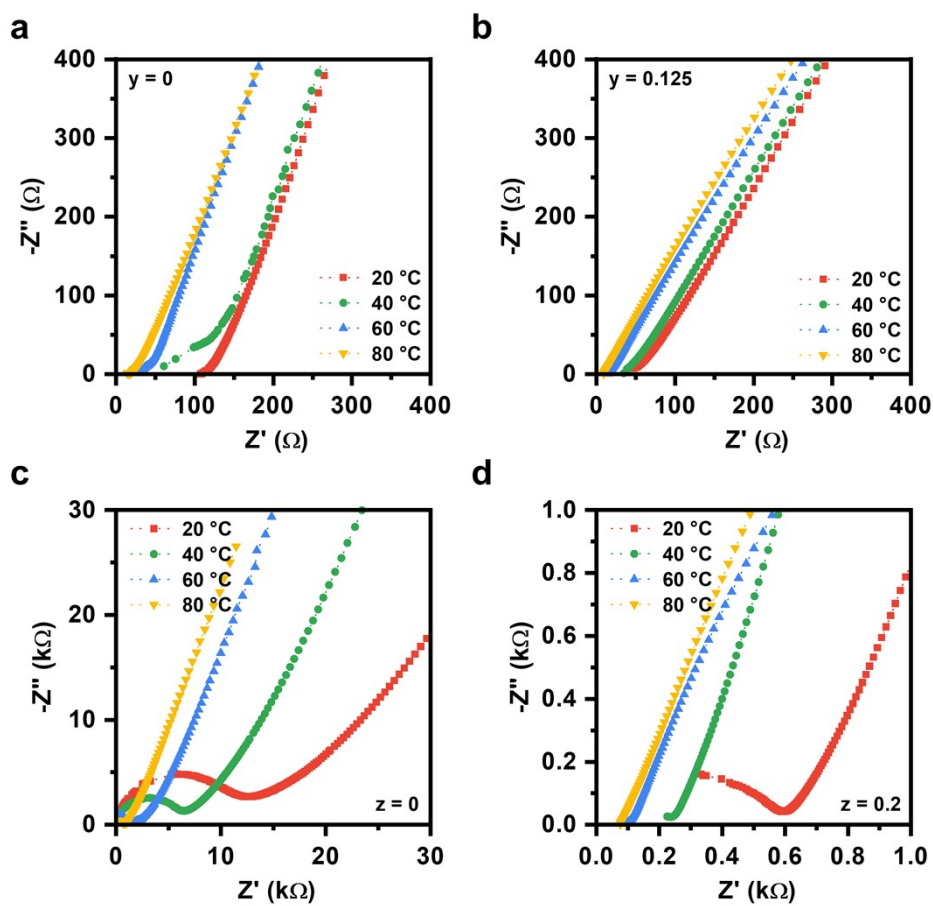

**Figure S14.** Nyquist plots acquired in the temperature range of 20 - 80 °C for (a)  $\text{Li}_6\text{PS}_5\text{Br}$ , (b)  $\text{Li}_{6.125}\text{P}_{0.875}\text{Sn}_{0.125}\text{S}_5\text{Br}$ , (c)  $\text{Li}_6\text{PS}_5\text{I}$ , and (d)  $\text{Li}_{6.2}\text{P}_{0.8}\text{Sn}_{0.2}\text{S}_5\text{I}$ . Measurements were carried out using symmetric cells comprising solid electrolytes sandwiched between two identical Li-ion-blocking Ti electrodes.

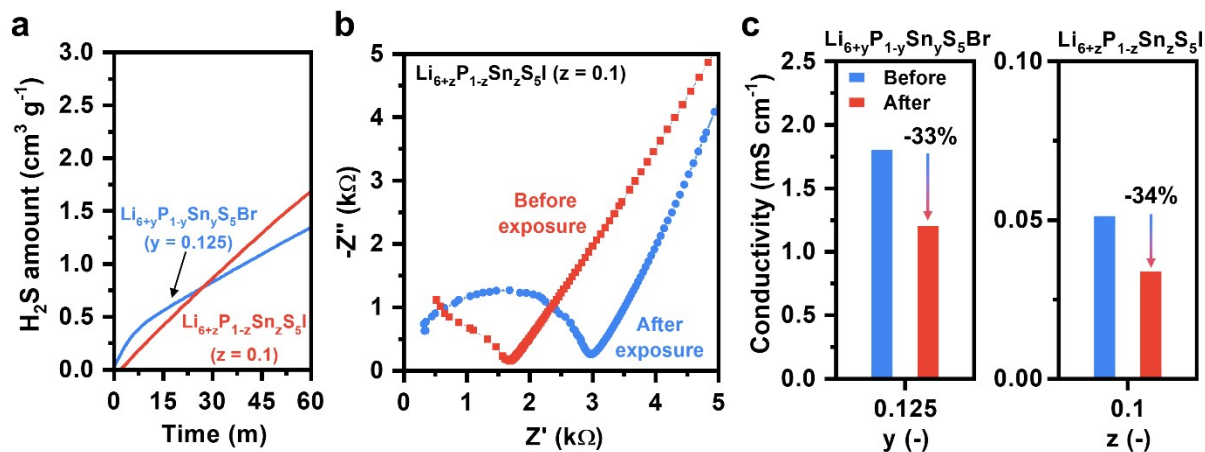

**Figure S15.** (a) Time-lapse detection of the amount of H<sub>2</sub>S produced from two solid electrolytes upon exposure to air: Li<sub>6.125</sub>P<sub>0.875</sub>Sn<sub>0.125</sub>S<sub>5</sub>Br and Li<sub>6.1</sub>P<sub>0.9</sub>Sn<sub>0.1</sub>S<sub>5</sub>I. (b) Nyquist plots of Li<sub>6.1</sub>P<sub>0.9</sub>Sn<sub>0.1</sub>S<sub>5</sub>I before and after exposure. (c) Bar diagrams representing the changes in the ionic conductivities of Li<sub>6.125</sub>P<sub>0.875</sub>Sn<sub>0.125</sub>S<sub>5</sub>Br and Li<sub>6.1</sub>P<sub>0.9</sub>Sn<sub>0.1</sub>S<sub>5</sub>I after exposure.



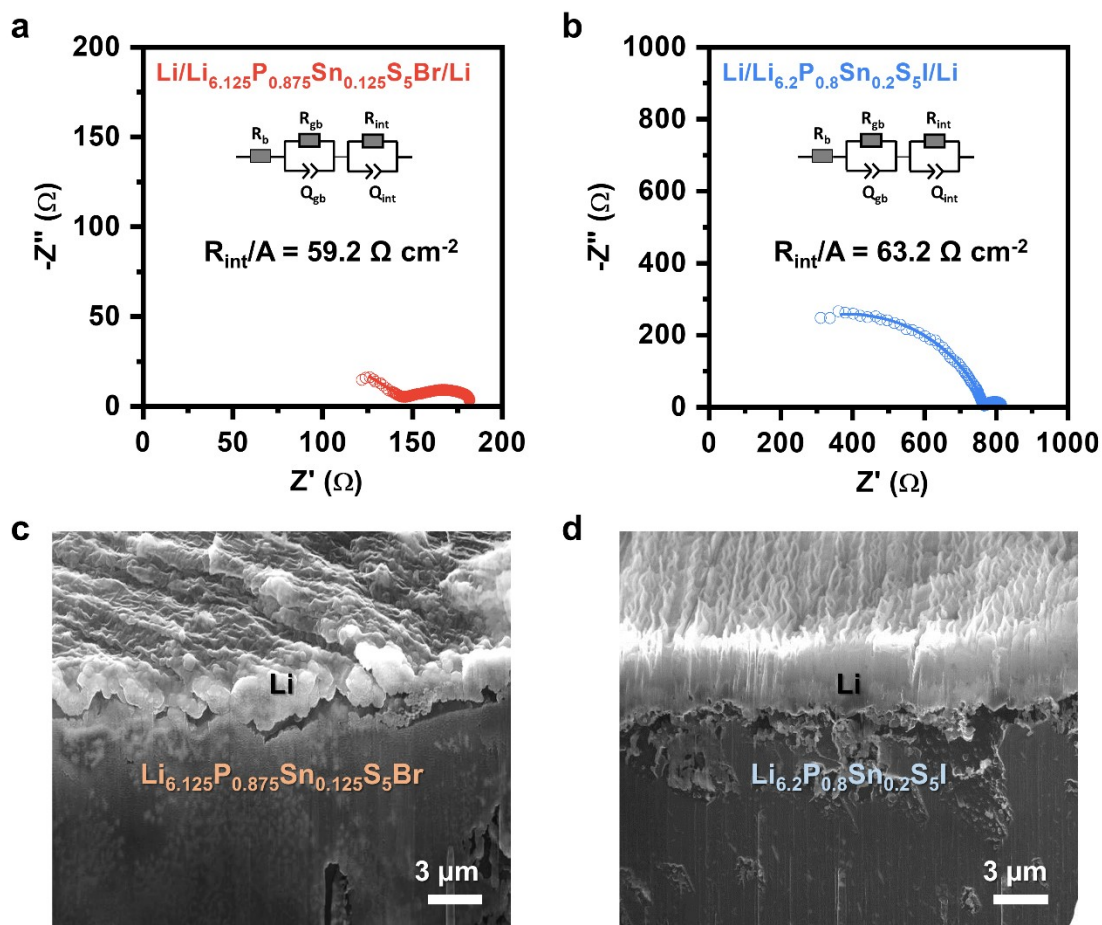

**Figure S16.** (a,b) Nyquist plots and (c,d) FIB-milled cross-sectional SEM images of two symmetric cells comprising two identical Li foils apart by  $\text{Li}_{6.125}\text{P}_{0.875}\text{Sn}_{0.125}\text{S}_5\text{Br}$  (a,c) and  $\text{Li}_{6.2}\text{P}_{0.8}\text{Sn}_{0.2}\text{S}_5\text{I}$  (b,d) after five cycles of Li deposition/stripping at  $0.1 \text{ mA cm}^{-2}$ . Insets in (a) and (b) are the equivalent circuits used for fitting the spectra. The areal interfacial resistances ( $R_{\text{int}}/A$ ;  $A = 0.785 \text{ cm}^2$ ) of the two cells are presented in (a) and (b), respectively.

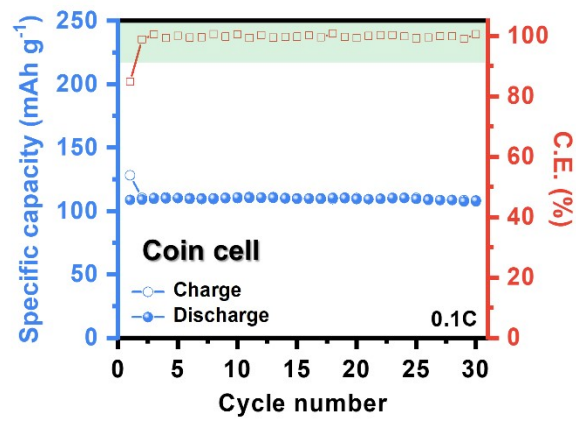

**Figure S17.** Cycling stability at 0.1C for a coin cell comprising the NCM composite cathode, a Celgard separator wet with the liquid electrolyte, and a Li foil anode.

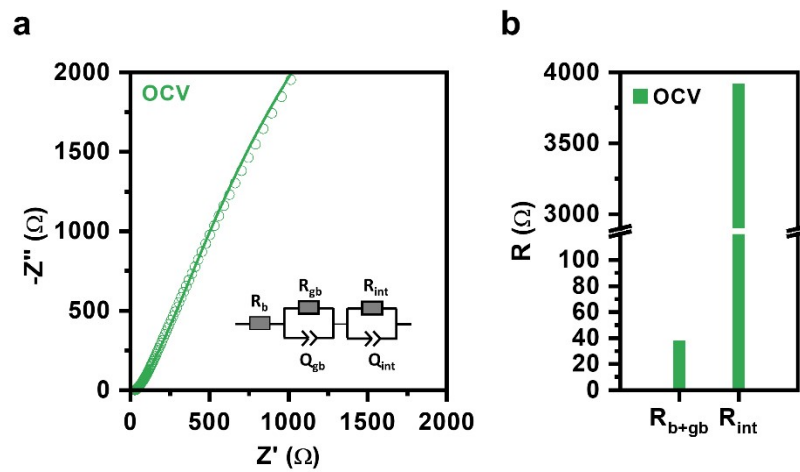

**Figure S18.** (a) Nyquist plot of a full cell at open circuit voltage (OCV) before cycling. Inset is an equivalent circuit used for fitting. (b) Fitted values of  $R_{b+gb}$  and  $R_{int}$  for OCV state.

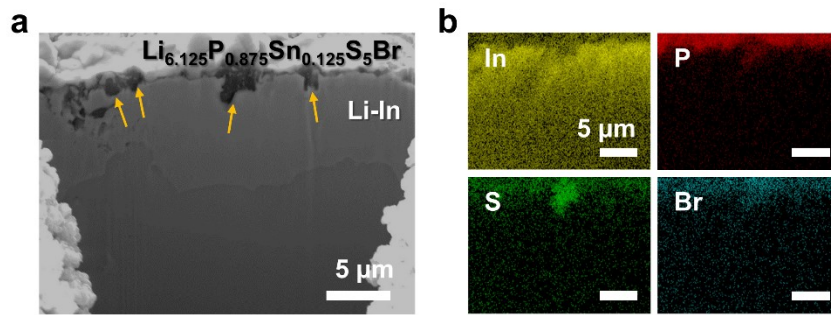

**Figure S19.** (a) Cross-section SEM image of the FIB-milled interface between the anode and solid electrolyte of a full cell when discharged and (b) its corresponding EDX elemental mapping (In, P, S, and Br). The orange arrows in (a) denote voids formed at the interface.

**Table S1.** Rietveld refinement parameters for  $\text{Li}_6\text{PS}_5\text{Br}$  (space group = F-43m,  $a = 9.99835(16)$  Å,  $R_{\text{Bragg}} = 2.234$ , GOF = 3.20). Impurities: 10.0(3) wt%  $\text{Li}_2\text{S}$ , 5.18(8) wt% LiBr.

| Atom | Wyckoff Site | X           | Y            | Z           | Occ.     | $B_{\text{iso}}$ (Å <sup>2</sup> ) |
|------|--------------|-------------|--------------|-------------|----------|------------------------------------|
| S1   | 4d           | 0.25        | 0.25         | 0.75        | 0.768(4) | 2.408                              |
| S2   | 16e          | 0.11934(16) | -0.11934(16) | 0.61934(16) | 1.005(4) | 1.99                               |
| S3   | 4a           | 0.0         | 0.0          | 1.0         | 0.232(4) | 2.842                              |
| P1   | 4b           | 0.0         | 0.0          | 0.5         | 1.000(2) | 1.579                              |
| Br1  | 4a           | 0.0         | 0.0          | 1.0         | 0.768(4) | 2.842                              |
| Br2  | 4d           | 0.25        | 0.25         | 0.75        | 0.232(4) | 2.408                              |
| Li1  | 48h          | 0.30710     | 0.02510      | 0.69290     | 0.441    | 4.422                              |
| Li2  | 24g          | 0.25        | 0.017        | 0.75        | 0.119    | 0.8685                             |

**Table S2.** Rietveld refinement parameters for  $\text{Li}_{6.075}\text{P}_{0.925}\text{Sn}_{0.075}\text{S}_5\text{Br}$  (space group = F-43m,  $a = 10.02087(13)$  Å,  $R_{\text{Bragg}} = 2.589$ , GOF = 2.00). Impurities: 2.03(13) wt%  $\text{Li}_2\text{S}$ , 1.26(5) wt%  $\text{LiBr}$ , 5.74(10) wt%  $\text{LiBr}\cdot\text{H}_2\text{O}$ .

| Atom | Wyckoff Site | X           | Y            | Z           | Occ.     | $B_{\text{iso}}$ (Å <sup>2</sup> ) |
|------|--------------|-------------|--------------|-------------|----------|------------------------------------|
| S1   | 4d           | 0.25        | 0.25         | 0.75        | 0.822(4) | 2.408                              |
| S2   | 16e          | 0.12076(17) | -0.12076(17) | 0.62076(17) | 1.000(4) | 1.99                               |
| S3   | 4a           | 0.0         | 0.0          | 1.0         | 0.178(4) | 2.842                              |
| P1   | 4b           | 0.0         | 0.0          | 0.5         | 0.942(3) | 1.579                              |
| Sn1  | 4b           | 0.0         | 0.0          | 0.5         | 0.058(3) | 1.579                              |
| Br1  | 4a           | 0.0         | 0.0          | 1.0         | 0.822(4) | 2.842                              |
| Br2  | 4d           | 0.25        | 0.25         | 0.75        | 0.178(4) | 2.408                              |
| Li1  | 48h          | 0.30710     | 0.02510      | 0.69290     | 0.441    | 4.422                              |
| Li2  | 24g          | 0.25        | 0.017        | 0.75        | 0.119    | 0.8685                             |

**Table S3.** Rietveld refinement parameters for  $\text{Li}_{6.125}\text{P}_{0.875}\text{Sn}_{0.125}\text{S}_5\text{Br}$  (space group = F-43m,  $a = 10.02797(13)$  Å,  $R_{\text{Bragg}} = 2.434$ , GOF = 2.54). Impurities: 6.21(17) wt%  $\text{Li}_2\text{S}$ , 4.83(8) wt%  $\text{LiBr}$ , 3.14(13) wt%  $\text{Li}_4\text{SnS}_4$ .

| Atom | Wyckoff Site | X           | Y            | Z           | Occ.     | $B_{\text{iso}}$ (Å <sup>2</sup> ) |
|------|--------------|-------------|--------------|-------------|----------|------------------------------------|
| S1   | 4d           | 0.25        | 0.25         | 0.75        | 0.824(4) | 2.408                              |
| S2   | 16e          | 0.11979(17) | -0.11979(17) | 0.61979(17) | 1.000(4) | 1.99                               |
| S3   | 4a           | 0.0         | 0.0          | 1.0         | 0.176(4) | 2.842                              |
| P1   | 4b           | 0.0         | 0.0          | 0.5         | 0.925(3) | 1.579                              |
| Sn1  | 4b           | 0.0         | 0.0          | 0.5         | 0.075(3) | 1.579                              |
| Br1  | 4a           | 0.0         | 0.0          | 1.0         | 0.824(4) | 2.842                              |
| Br2  | 4d           | 0.25        | 0.25         | 0.75        | 0.176(4) | 2.408                              |
| Li1  | 48h          | 0.30710     | 0.02510      | 0.69290     | 0.441    | 4.422                              |
| Li2  | 24g          | 0.25        | 0.017        | 0.75        | 0.119    | 0.8685                             |

**Table S4.** Rietveld refinement parameters for  $\text{Li}_6\text{PS}_5\text{I}$  (space group = F-43m,  $a = 10.14656(10)$  Å,  $R_{\text{Bragg}} = 4.759$ , GOF = 2.53). Impurities: 7.0(8) wt%  $\text{Li}_2\text{S}$ .

| Atom | Wyckoff Site | X         | Y          | Z         | Occ.    | $B_{\text{iso}}$ (Å <sup>2</sup> ) |
|------|--------------|-----------|------------|-----------|---------|------------------------------------|
| S1   | 4d           | 0.25      | 0.25       | 0.75      | 1.10(5) | 1.295                              |
| S2   | 16e          | 0.1189(3) | -0.1189(3) | 0.6189(3) | 1.00(5) | 1.532                              |
| P1   | 4b           | 0.0       | 0.0        | 0.5       | 0.96(4) | 1.003                              |
| I1   | 4a           | 0.0       | 0.0        | 1.0       | 0.99(4) | 2.361                              |
| Li1  | 48h          | 0.300(2)  | 0.013(7)   | 0.700(2)  | 0.37    | 3.079                              |
| Li2  | 24g          | 0.25      | 0.01(2)    | 0.75      | 0.26    | 3.948                              |



**Table S5.** Rietveld refinement parameters for  $\text{Li}_{6.1}\text{P}_{0.9}\text{Sn}_{0.1}\text{S}_5\text{I}$  (space group = F-43m, a = 10.2020(4) Å,  $R_{\text{Bragg}} = 4.788$ , GOF = 3.01). Impurities: 3.7(7) wt%  $\text{Li}_2\text{S}$ , 3.1(6) wt%  $\text{LiI}\cdot\text{H}_2\text{O}$ .

| Atom | Wyckoff Site | X         | Y          | Z         | Occ.    | $B_{\text{iso}}$ (Å <sup>2</sup> ) |
|------|--------------|-----------|------------|-----------|---------|------------------------------------|
| S1   | 4d           | 0.25      | 0.25       | 0.75      | 1.02(9) | 1.295                              |
| S2   | 16e          | 0.1205(4) | -0.1205(4) | 0.6205(4) | 1.00(9) | 1.532                              |
| P1   | 4b           | 0.0       | 0.0        | 0.5       | 0.89(4) | 1.003                              |
| Sn1  | 4b           | 0.0       | 0.0        | 0.5       | 0.11(4) | 1.003                              |
| I1   | 4a           | 0.0       | 0.0        | 1.0       | 0.99(9) | 2.361                              |
| Li1  | 48h          | 0.299(4)  | 0.003(13)  | 0.701(4)  | 0.37    | 3.079                              |
| Li2  | 24g          | 0.25      | 0.02(2)    | 0.75      | 0.26    | 3.948                              |

**Table S6.** Rietveld refinement parameters for  $\text{Li}_{6.2}\text{P}_{0.8}\text{Sn}_{0.2}\text{S}_5\text{I}$  (space group = F-43m,  $a = 10.21411(18)$  Å,  $R_{\text{Bragg}} = 2.207$ , GOF = 1.64). Impurities: 4.2(4) wt%  $\text{Li}_2\text{S}$ , 4.35(16) wt% LiI.

| Atom | Wyckoff Site | X         | Y          | Z         | Occ.    | $B_{\text{iso}}$ (Å <sup>2</sup> ) |
|------|--------------|-----------|------------|-----------|---------|------------------------------------|
| S1   | 4d           | 0.25      | 0.25       | 0.75      | 1.05(5) | 1.295                              |
| S2   | 16e          | 0.1208(2) | -0.1208(2) | 0.6208(2) | 1.04(5) | 1.532                              |
| P1   | 4b           | 0.0       | 0.0        | 0.5       | 0.83(3) | 1.003                              |
| Sn1  | 4b           | 0.0       | 0.0        | 0.5       | 0.17(3) | 1.003                              |
| I1   | 4a           | 0.0       | 0.0        | 1.0       | 0.98(5) | 2.361                              |
| Li1  | 48h          | 0.298(2)  | 0.014(6)   | 0.702(2)  | 0.37    | 3.079                              |
| Li2  | 24g          | 0.25      | 0.035(10)  | 0.75      | 0.26    | 3.948                              |

**Table S7.** Electronic conductivities ( $\sigma_{el}$ ) and electronic transference numbers ( $t_{el}$ ) of two groups of halide Li argyrodites:  $\text{Li}_{6+y}\text{P}_{1-y}\text{Sn}_y\text{S}_5\text{Br}$  and  $\text{Li}_{6+z}\text{P}_{1-z}\text{Sn}_z\text{S}_5\text{I}$ .

| $\text{Li}_{6+y}\text{P}_{1-y}\text{Sn}_y\text{S}_5\text{Br}$ |                                                   |                       | $\text{Li}_{6+z}\text{P}_{1-z}\text{Sn}_z\text{S}_5\text{I}$ |                                                   |                       |
|---------------------------------------------------------------|---------------------------------------------------|-----------------------|--------------------------------------------------------------|---------------------------------------------------|-----------------------|
| $y$                                                           | $\sigma_{el}$<br>( $10^{-6} \text{ mS cm}^{-1}$ ) | $t_{el}$              | $z$                                                          | $\sigma_{el}$<br>( $10^{-6} \text{ mS cm}^{-1}$ ) | $t_{el}$              |
| 0                                                             | 2.00                                              | $2.04 \times 10^{-6}$ | 0                                                            | 2.00                                              | $2.50 \times 10^{-4}$ |
| 0.075                                                         | 3.00                                              | $2.14 \times 10^{-6}$ | 0.1                                                          | 2.00                                              | $3.64 \times 10^{-5}$ |
| 0.125                                                         | 2.00                                              | $1.05 \times 10^{-6}$ | 0.2                                                          | 2.00                                              | $1.43 \times 10^{-5}$ |
| 0.2                                                           | 2.00                                              | $1.33 \times 10^{-6}$ | 0.3                                                          | 1.00                                              | $9.09 \times 10^{-6}$ |

**Table S8.** Fitted values of the equivalent circuit elements for the Nyquist plots at the open circuit voltage (OCV), charged, and discharged states.

| <b>Values</b> | <b>R<sub>b</sub> (Ω)</b> | <b>R<sub>gb</sub> (Ω)</b> | <b>C<sub>gb</sub> (μF)</b> | <b>R<sub>int</sub> (Ω)</b> |  | <b>C<sub>int</sub> (mF)</b> |  |
|---------------|--------------------------|---------------------------|----------------------------|----------------------------|--|-----------------------------|--|
| OCV           | 29                       | 9.0                       | 46                         | 3921                       |  | 5.79                        |  |

  

| <b>Values</b> | <b>R<sub>b</sub> (Ω)</b> | <b>R<sub>gb</sub> (Ω)</b> | <b>C<sub>gb</sub> (μF)</b> | <b>R<sub>cse</sub> (Ω)</b> | <b>C<sub>cse</sub> (mF)</b> | <b>R<sub>ase</sub> (Ω)</b> | <b>C<sub>ase</sub> (mF)</b> |
|---------------|--------------------------|---------------------------|----------------------------|----------------------------|-----------------------------|----------------------------|-----------------------------|
| Charged       | 32.5                     | 9.2                       | 29                         | 78.1                       | 0.16                        | 38.2                       | 0.46                        |
| Discharged    | 35                       | 10.1                      | 10                         | 102                        | 0.24                        | 801                        | 1.11                        |

**Table S9.** Summarized list of Li-argyrodite solid electrolytes fabricated *via* liquid-phase techniques.

| Solid electrolyte                                                               | Method                    | Solvent               | $\sigma_{\text{ion}}$ (mS cm <sup>-1</sup> ) | Air stable | Li compatible | Full cell (mAh g <sup>-1</sup> @ cycle) | Ref.             |
|---------------------------------------------------------------------------------|---------------------------|-----------------------|----------------------------------------------|------------|---------------|-----------------------------------------|------------------|
| <b>Li<sub>6+y</sub>P<sub>1-y</sub>Sn<sub>y</sub>S<sub>5</sub>Br (y = 0.125)</b> | <b>Solvent-assisted</b>   | ACN                   | <b>1.9</b>                                   | <b>O</b>   | <b>O</b>      | <b>99 @ 50<sup>th</sup></b>             | <b>This work</b> |
| Li <sub>6</sub> PS <sub>5</sub> Cl                                              | Solvent-assisted          | THF                   | 2.03                                         | X          | X             | 70 @ 100 <sup>th</sup>                  | [1]              |
| Li <sub>6</sub> PS <sub>5</sub> Cl-15P <sub>2</sub> S <sub>5</sub>              | Solvent-assisted          | Pyridine              | 4.3                                          | X          | O             | 86 @ 50 <sup>th</sup>                   | [2]              |
| Li <sub>6</sub> PS <sub>5</sub> Cl                                              | Solvent-assisted          | THF                   | 1.9                                          | X          | X             | 132 @ 1 <sup>st</sup>                   | [3]              |
| Li <sub>6</sub> PS <sub>5</sub> Cl                                              | Solvent-assisted          | EtOH                  | 0.21                                         | X          | O             | 62 @ 1 <sup>st</sup>                    | [4]              |
| Li <sub>5.5</sub> PS <sub>4.5</sub> Cl <sub>1.5</sub>                           | Solvent-assisted          | EDA <sup>1)</sup>     | 2.87                                         | X          | O             | 110 @ 10 <sup>th</sup>                  | [5]              |
| Li <sub>6</sub> PS <sub>5</sub> Cl                                              | Solvent-assisted          | EA <sup>2)</sup>      | 1.1                                          | X          | X             | 62 @ 25 <sup>th</sup>                   | [6]              |
| Li <sub>6</sub> PS <sub>5</sub> Cl                                              | Co-solvent-assisted       | THF/EtOH              | 2.4                                          | X          | X             | 239 @ 1 <sup>st</sup>                   | [7]              |
| Li <sub>6</sub> PS <sub>5</sub> Br                                              | Co-solvent-assisted       | THF/EtOH              | 3.1                                          | X          | X             | 110 @ 30 <sup>th</sup>                  | [8]              |
| Li <sub>6</sub> PS <sub>5</sub> Br                                              | Co-solvent-assisted       | EP/EtOH <sup>3)</sup> | 0.034                                        | X          | X             | 87 @ 10 <sup>th</sup>                   | [9]              |
| Li <sub>6</sub> PS <sub>5</sub> Cl·LiCl                                         | Co-solvent-assisted       | THF/EtOH              | 0.53                                         | X          | O             | 135 @ 50 <sup>th</sup>                  | [10]             |
| Li <sub>6.5</sub> P <sub>0.5</sub> Ge <sub>0.5</sub> S <sub>5</sub> I           | Diss.-prec. <sup>4)</sup> | EtOH                  | 0.54                                         | X          | X             | 135 @ 100 <sup>th</sup>                 | [11]             |
| Li <sub>6</sub> PS <sub>5</sub> Br                                              | Diss.-prec.               | EtOH                  | 0.19                                         | X          | X             | 55 @ 10 <sup>th</sup>                   | [12]             |
| Li <sub>6</sub> PS <sub>5</sub> Cl                                              | Diss.-prec.               | EtOH                  | 1                                            | X          | X             | 90 @ 100 <sup>th</sup>                  | [13]             |
| Li <sub>6</sub> PS <sub>5</sub> Cl                                              | Diss.-prec.               | ACN/EtOH              | 0.6                                          | X          | X             | 120 @ 25 <sup>th</sup>                  | [14]             |
| Li <sub>6</sub> PS <sub>5</sub> Cl                                              | Diss.-prec.               | EtOH                  | 0.014                                        | X          | X             | 45 @ 10 <sup>th</sup>                   | [15]             |

1) EDA: ethylenediamine; 2) EA: ethyl acetate; 3) EP: ethyl propionate; 4) Diss.-prec.: Dissolution-precipitation

## Supplementary Note S1

In principle, the sound velocity ( $v_s$ ) in a solid is proportional to the Debye frequency ( $\nu_D$ ), which is known to decrease with decreasing lattice vibration,<sup>16,17</sup> as expressed by the equation below:

$$\nu_D = \left( \frac{3N}{4\pi} \right)^{1/3} v_s$$

where  $N$  denotes the number density of atoms in a solid. Therefore, for simplicity, we will only discuss the effects of lattice vibration on the ionic conductivity afterwards.

The conventional hopping theory generally describes  $\sigma_0$  of the ionic conductivity using the equation below:<sup>16</sup>

$$\sigma_0 = \frac{fn(Ze)^2}{k_B} e^{\Delta S_m/k_B} a_0^2 \nu_0$$

where  $f$  denotes the correlation factor,  $n$  the charge carrier density,  $Ze$  the charge of the carrier,  $\Delta S_m$  the entropy of the migration,  $a_0$  the jump distance, and  $\nu_0$  the jump attempt frequency. Importantly,  $\sigma_0$  is proportional to the exponential of  $\Delta S_m/k_B$  multiplied by  $\nu_0$ . As  $\Delta S_m$  is dominated by lattice (phonon) vibration and  $\nu_0$  is generally approximated by the Debye frequency ( $\nu_D$ ),<sup>16</sup>  $\sigma_0$  becomes smaller as lattice vibration decreases.

On the other hand, lattice vibration has been experimentally found to affect the activation energy ( $E_a$ ) as well.<sup>16</sup> When there is site disorder between  $X^-$  and  $S^{2-}$  ions in Li argyrodites,  $E_a$  decreases with decreasing lattice vibration, which in turn leads to the larger  $\exp(-E_a/k_B T)$ .

Given the fact that the ionic conductivity is the product of  $\sigma_0$  and  $\exp(-E_a/k_B T)$ , the ionic conductivity is barely influenced by the change in lattice vibration because of the contradicting effects of  $\sigma_0$  and  $\exp(-E_a/k_B T)$  on the ionic conductivity. This behavior is typically described using the Meyer-Neldel (compensation) rule.<sup>18</sup> One exception to this behavior is iodide argyrodites. Due to the lack of site disorder in these materials, the decrease in lattice vibration decreases  $\sigma_0$  while increasing  $E_a$  (i.e., decreasing  $\exp(-E_a/k_B T)$ ).<sup>16</sup> This is the reason why iodide argyrodites have the significantly lower ionic conductivities than chloride or bromide argyrodites.”

## References

1. Y. J. Heo, S.-D. Seo, S.-H. Hwang, S. H. Choi and D.-W. Kim, *Int. J. Energy Res.*, 2022, **46**, 17644-17653.
2. R. Rajagopal, Y. Subramanian, Y. J. Jung, S. Kang and K.-S. Ryu, *ACS Appl. Energy Mater.*, 2022, **5**, 9266-9272.
3. M. Duchardt, M. Diels, B. Roling and S. Dehnen, *ACS Appl. Energy Mater.*, 2020, **3**, 6937-6945.
4. Z. Zhang, L. Zhang, Y. Liu, X. Yan, B. Xu and L.-m. Wang, *J. Alloys Compd.*, 2020, **812**, 152103.
5. Y. Subramanian, R. Rajagopal and K.-S. Ryu, *Scr. Mater.*, 2021, **204**, 114129.
6. S. Choi, J. Ann, J. Do, S. Lim, C. Park and D. Shin, *J. Electrochem. Soc.*, 2019, **166**, A5193.
7. L. Zhou, K.-H. Park, X. Sun, F. Lalère, T. Adermann, P. Hartmann and L. F. Nazar, *ACS Energy Lett.*, 2019, **4**, 265-270.
8. S. Yubuchi, M. Uematsu, C. Hotehama, A. Sakuda, A. Hayashi and M. Tatsumisago, *J. Mater. Chem. A*, 2019, **7**, 558-566.
9. S. Chida, A. Miura, N. C. Rosero-Navarro, M. Higuchi, N. H. H. Phuc, H. Muto, A. Matsuda and K. Tadanaga, *Ceram. Int.*, 2018, **44**, 742-746.
10. W. Arnold, D. A. Buchberger, Y. Li, M. Sunkara, T. Druffel and H. Wang, *J. Power Sources*, 2020, **464**, 228158.
11. Y. B. Song, D. H. Kim, H. Kwak, D. Han, S. Kang, J. H. Lee, S.-M. Bak, K.-W. Nam, H.-W. Lee and Y. S. Jung, *Nano Lett.*, 2020, **20**, 4337-4345.
12. S. Yubuchi, M. Uematsu, M. Deguchi, A. Hayashi and M. Tatsumisago, *ACS Appl. Energy Mater.*, 2018, **1**, 3622-3629.
13. D. H. Kim, D. Y. Oh, K. H. Park, Y. E. Choi, Y. J. Nam, H. A. Lee, S.-M. Lee and Y. S. Jung, *Nano Lett.*, 2017, **17**, 3013-3020.
14. N. C. Rosero-Navarro, A. Miura and K. Tadanaga, *J. Power Sources*, 2018, **396**, 33-40.
15. S. Yubuchi, S. Teragawa, K. Aso, K. Tadanaga, A. Hayashi and M. Tatsumisago, *J. Power Sources*, 2015, **293**, 941-945.
16. M. A. Kraft, S. P. Culver, M. Calderon, F. Böcher, T. Krauskopf, A. Senyshyn, C. Dietrich, A. Zevalkink, J. Janek and W. G. Zeier, *J. Am. Chem. Soc.*, 2017, **139**, 10909-10918.
17. O. L. Anderson, *J. Phys. Chem. Solids*, 1963, **24**, 909-917.
18. K. L. Ngai, *Solid State Ion.*, 1998, **105**, 231-235.
